# Supplementary material
Source: PubMed Central journal article supplement (PMC5547004)

Supplementary Figure 1 *Standardized Path Coefficients from Bivariate Cholesky Models of Relationship between Age 17 Adolescent Alcohol Consumption Index and Age 29 Adult Functioning*

*Note.* Observed phenotypes are shown in squares and latent factors (A, C, and E) are shown in circles. Nonsignificant paths are reflected by dotted arrows and italics. Significant paths are reflected by solid arrows and bold text. Path coefficients have been standardized so that the proportion of variation in the ACI attributable to genetic causes equals  $a11^2$ ; the proportion of variation in each age 29 measure attributable to genetic influences common with the ACI equals  $a21^2$ , and the proportion of variation in each age 29 measure attributable to unique genetic influences equals  $a22^2$ .

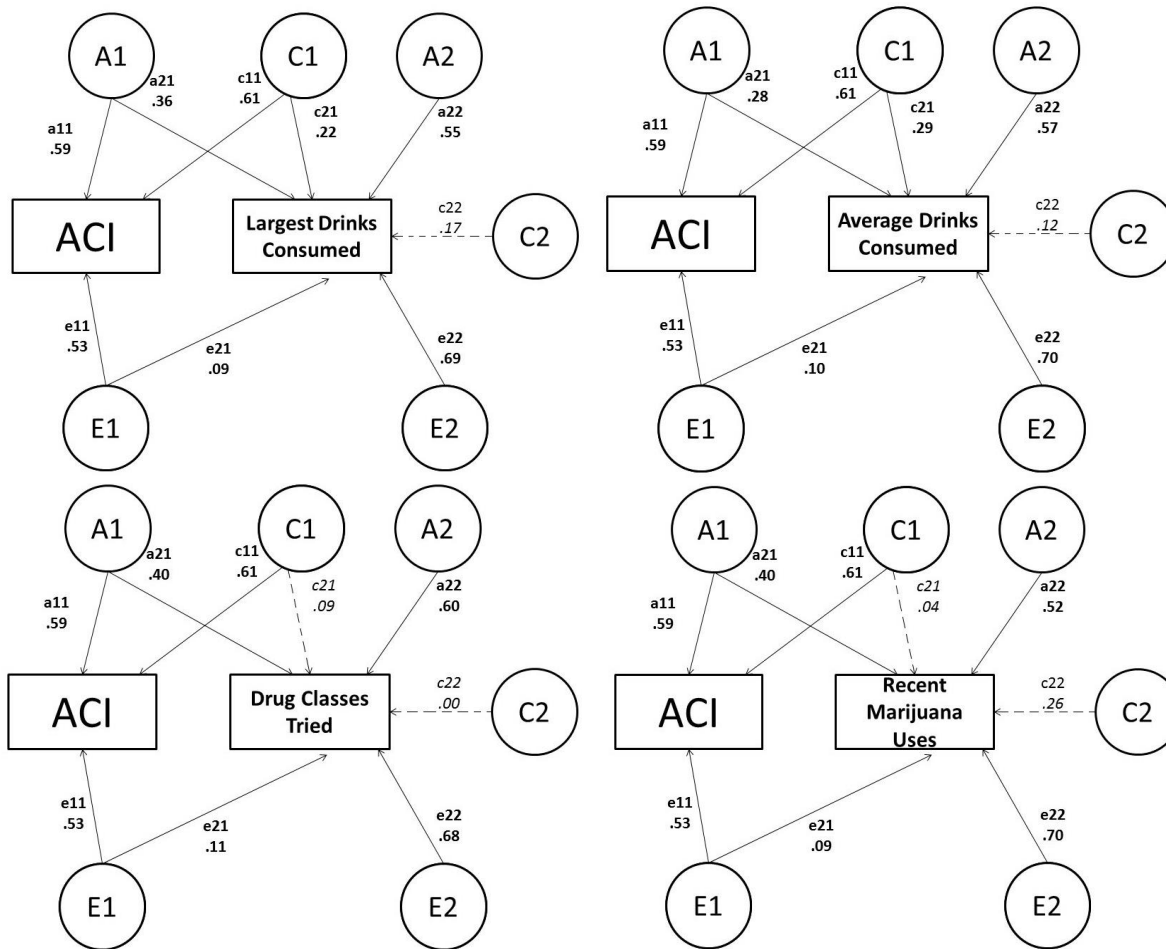

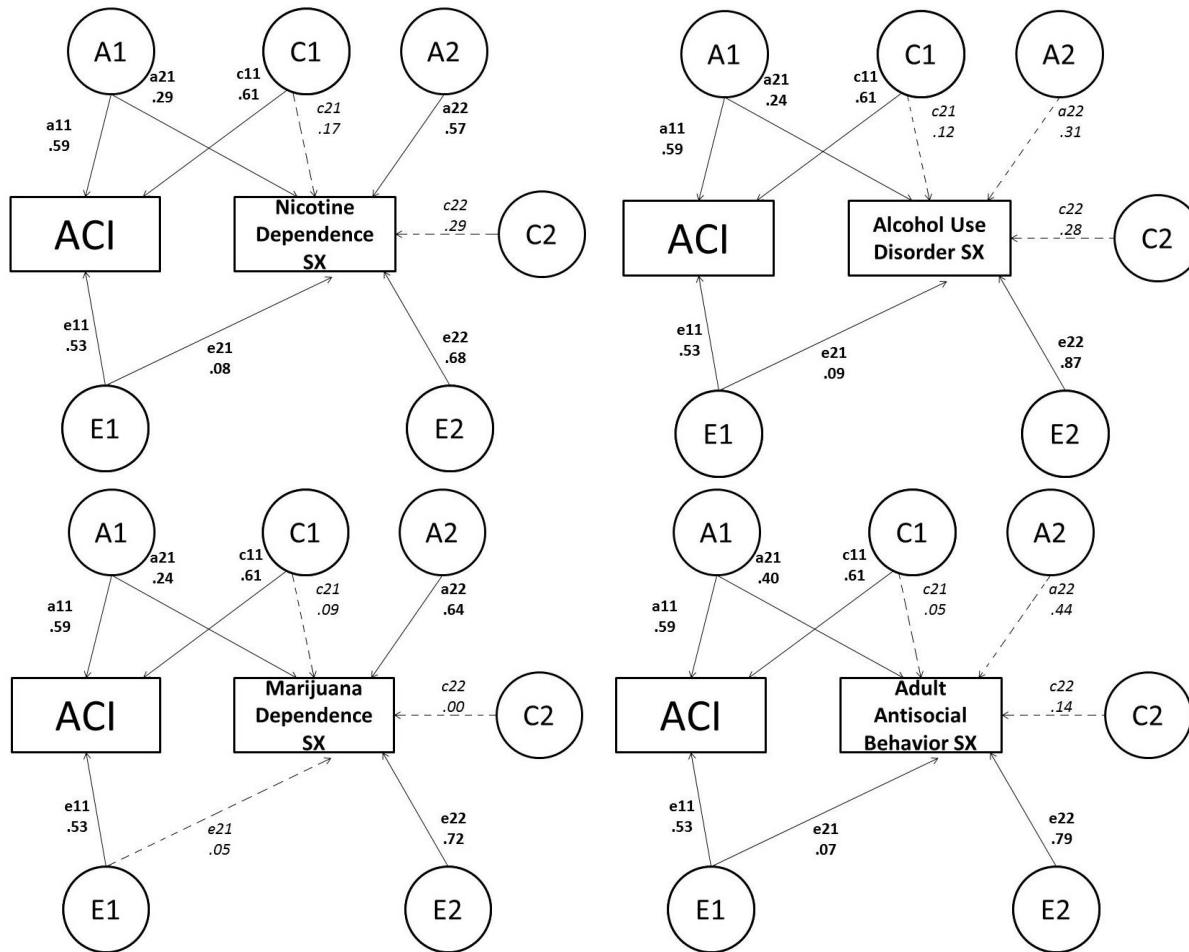

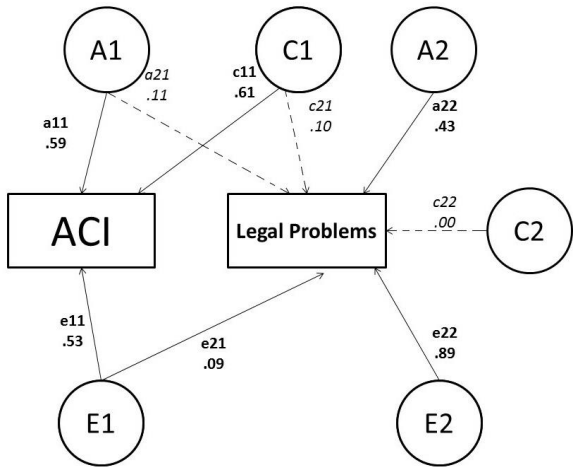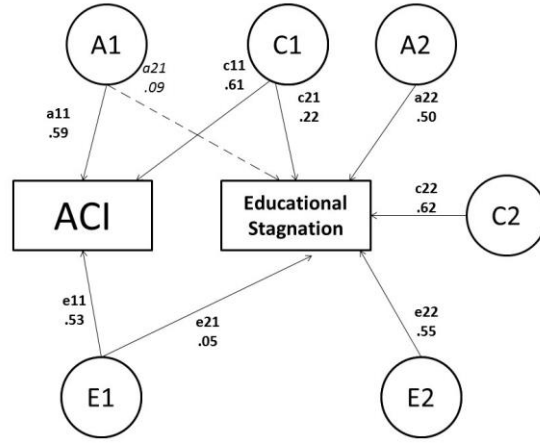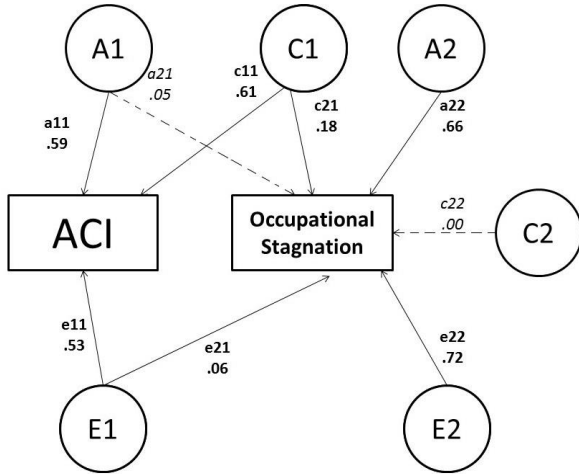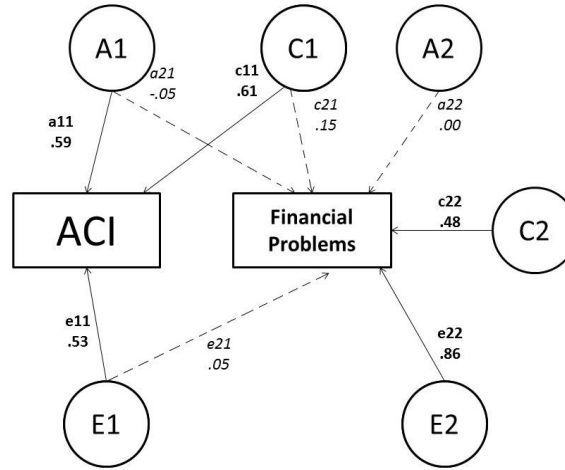

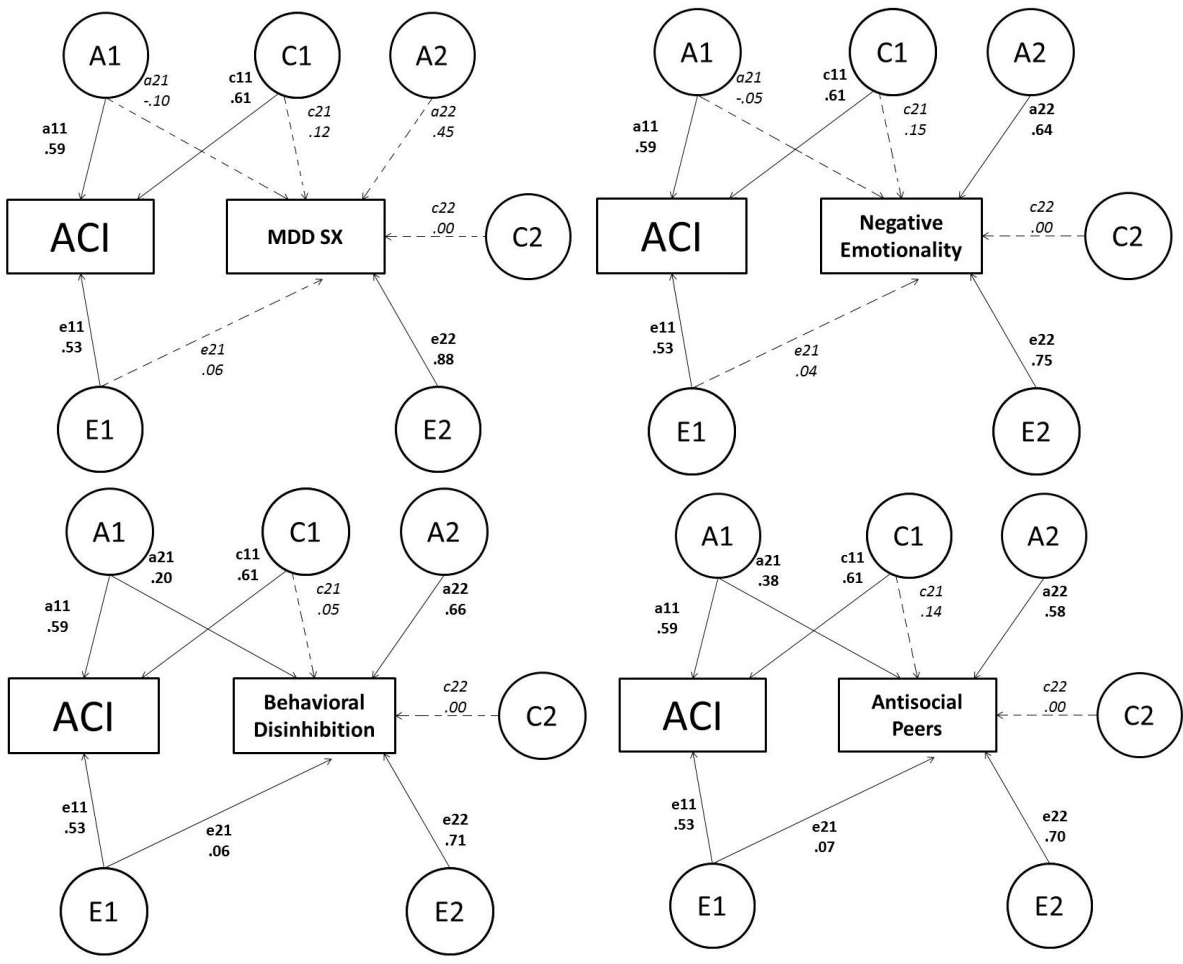

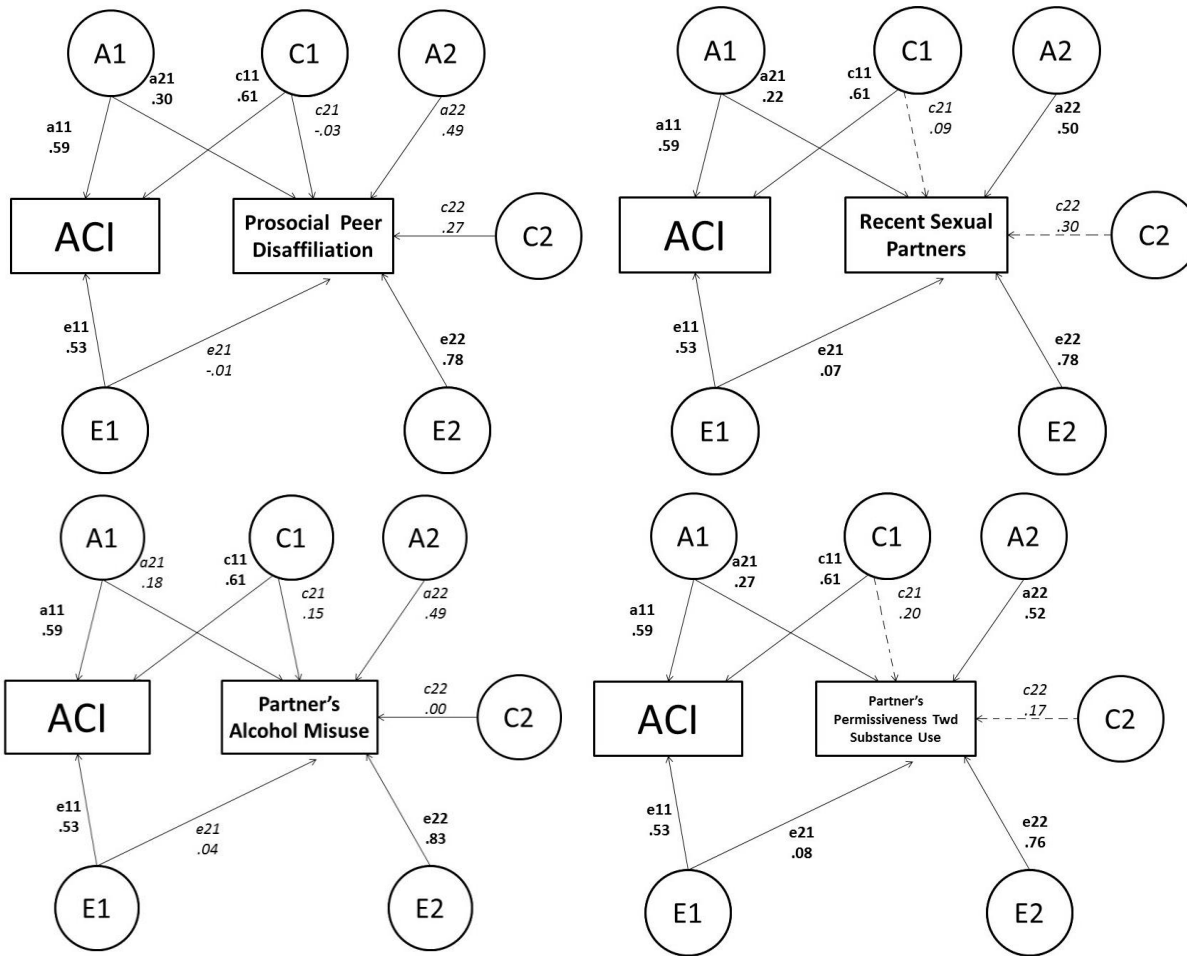

Supplement: NIHMS868259-supplement-Figures.pdf [file NIHMS868259-supplement-Figures.pdf]
